# Supplementary material
Source: publisher figshare collection journal article supplement (https://acs.figshare.com/ndownloader/files/4696624)
Supplement: Supplementary file 1 [file 4696624]

## **Supporting information Cover Sheet**

### **Heterogeneous reactions of linoleic acid and linolenic acid particles with ozone: Reaction pathways and changes in particle mass, hygroscopicity and morphology**

Alex K. Y. Lee and Chak K. Chan\*

Department of Chemical Engineering, Hong Kong University of Science and Technology,  
Clear Water Bay, Kowloon, Hong Kong

\*Corresponding author phone: (852) 2358-7124; fax: (852) 2358-0054; e-mail:  
keckchan@ust.hk

Number of pages (including cover page) = 3

Number of tables = 0

Number of figures = 2

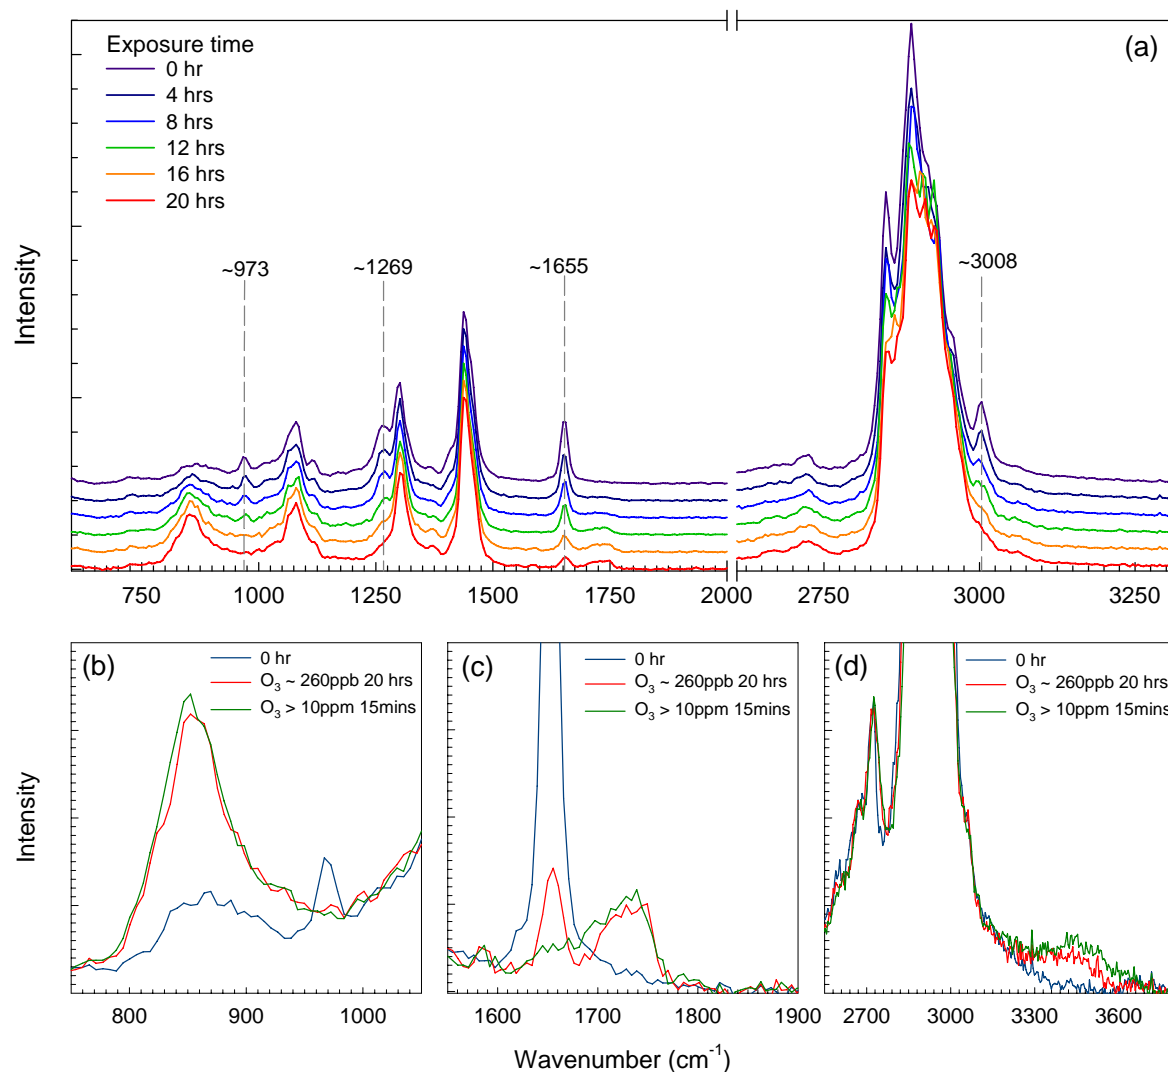

Figure S1 (a) Raman spectra of oleic acid particles at different ozone exposures obtained in the low ozone concentration experiments. Spectral features of ozone-processed oleic acid particles: Formation of (b) peroxides and ozonides, (c) carbonyl compounds and (d) hydroxyl compounds obtained in low ( $\sim 240\text{--}280$  ppb for 20 hrs) and high ozone concentration experiments ( $>10$  ppm for 1.5 hrs). The Raman spectra are normalized to the peak located at  $1443\text{ cm}^{-1}$ .

(a)

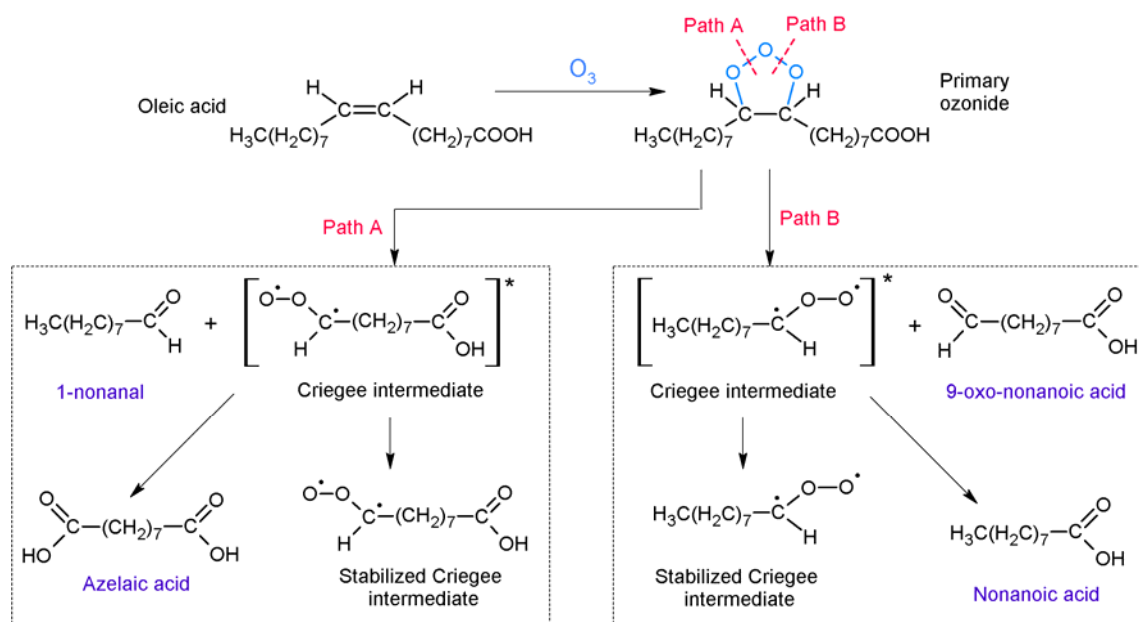

(b)

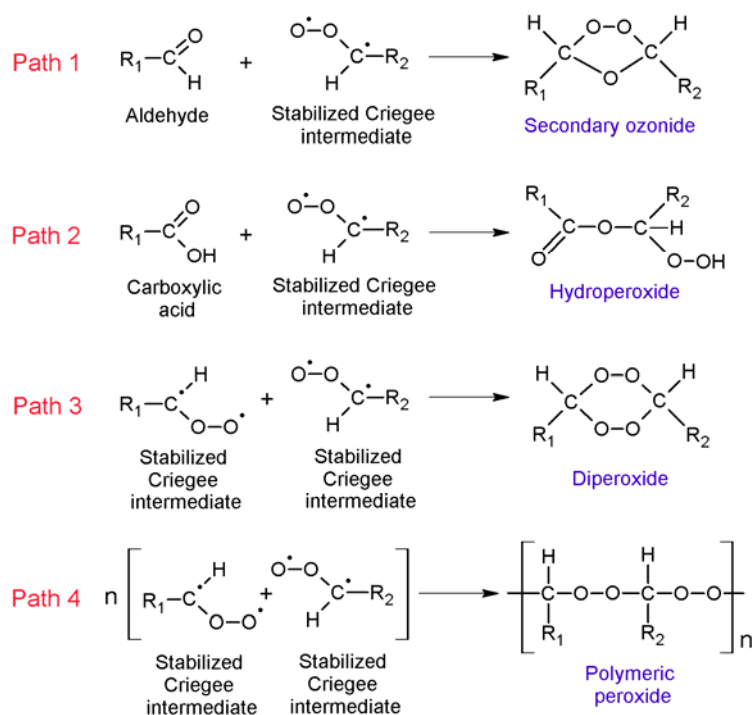

Figure S2 (a) Reaction pathways of the ozonolysis of oleic acid. (b) Possible reaction pathways involving stabilized Criegee intermediates.
